# Supplementary material for: miR-885-5p Negatively Regulates Warburg Effect by Silencing Hexokinase 2 in Liver Cancer
Source: PubMed Central journal article supplement — Mol Ther Nucleic Acids. 2019 Sep 12;18:308–19. doi: 10.1016/j.omtn.2019.09.002 (PMC6796743; doi:10.1016/j.omtn.2019.09.002), 2019-09-12
Supplement: mmc1.pdf [file mmc1.pdf]

OMTN, Volume 18

## **Supplemental Information**

### **miR-885-5p Negatively Regulates Warburg Effect by Silencing Hexokinase 2 in Liver Cancer**

**Fei Xu, Jing-Jun Yan, Yun Gan, Ying Chang, Hong-Ling Wang, Xing-Xing He, and Qiu Zhao**

## Supplemental material

### Supplemental Figures

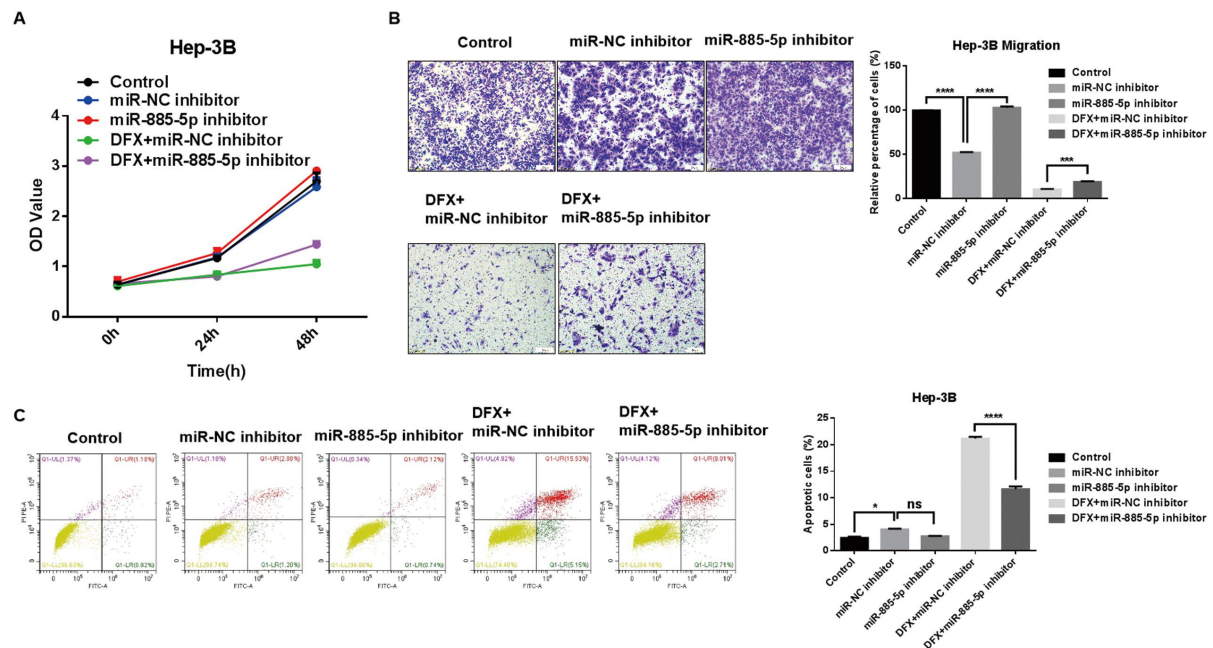

**Figure S1.** miR-885-5p inhibitor promoted the malignant phenotypes of HCC in vitro. **A** Effects of miR-885-5p inhibitor on proliferation over different time periods of Hep-3B cells. **B** Transwell assay of Hep-3B cells treated with miR-NC or miR-885-5p inhibitor (x 100). Histograms indicate the relative percentage of cells across the membrane. The relative percentage of migrating cells from control group is designated as 100%. **C** miR-885-5p inhibitor inhibited cell apoptosis. Cell apoptosis was detected by Annexin-V/propidium iodide combined labeling flow cytometry in Hep-3B cells 48 h after transfection. Quadrants from lower left to upper left (counter clockwise) represent healthy, early apoptotic, late apoptotic, and necrotic cells respectively. Apoptotic evaluation was determined by the percentage of apoptotic cell number in total cell number. All data are shown as mean  $\pm$  SEM of 3 independent experiments. The comparisons were evaluated using t-test. \*:  $P < 0.05$ , \*\*\*:  $P < 0.001$ , \*\*\*\*:  $P < 0.0001$ .

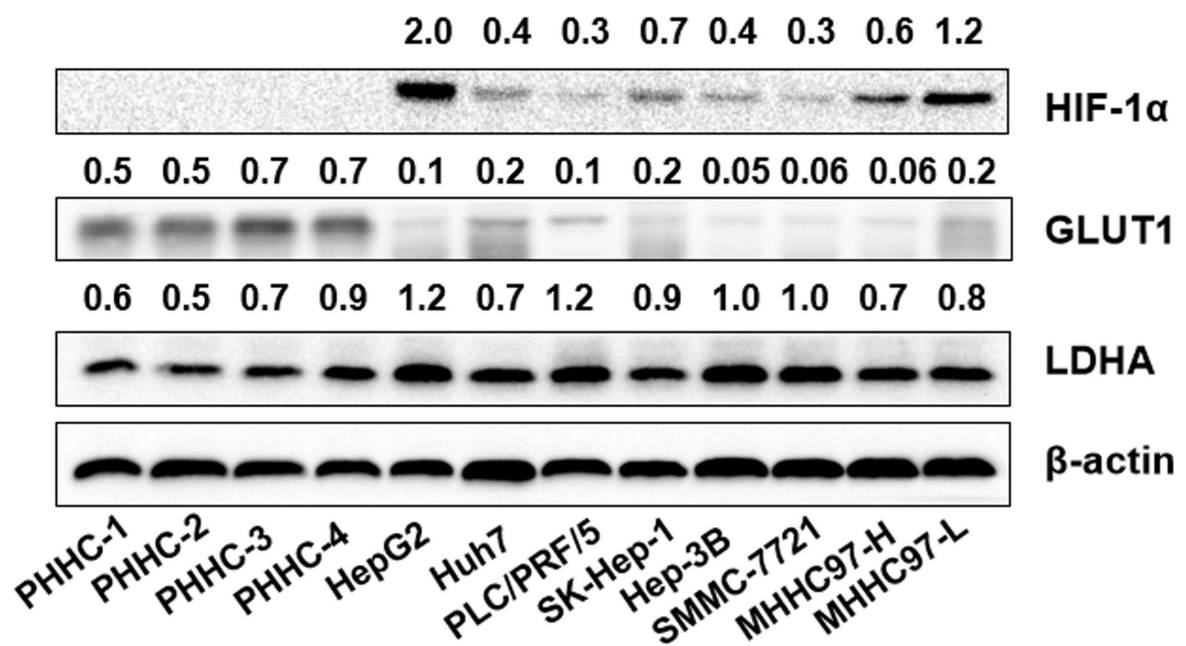

**Figure S2.** The protein levels of HIF-1 $\alpha$ , GLUT1 and LDHA in indicated HCC cell lines and normal PHHC. PHHC: primary human hepatocytes.

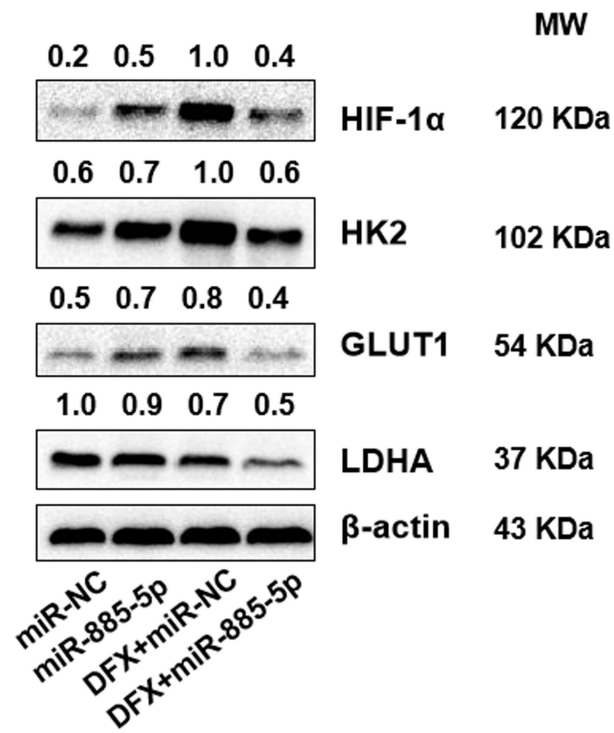

**Figure S3.** miR-885-5p suppressed the expression of HIF-1α, HK2, GLUT1 and LDHA at protein level in DFX induced hypoxia model in Huh7 cell line.

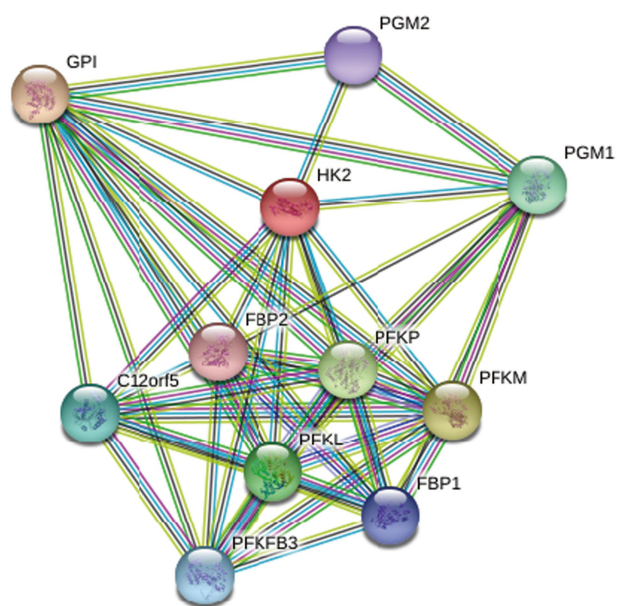

**Figure S4.** Protein-protein interaction network of HK2 related genes. Network nodes represent proteins, edges represent protein-protein associations based on the STRING database.
